# Supplementary material for: Cancer Dynamics: Identification of States for Therapeutic Intervention
Source: Preprints.org preprint supplement (doi:10.20944/preprints202005.0063.v1), 2020-05-05
Supplement: Supplementary file 1 [file supplementary]

# Supplementary Information

## Cancer dynamics: Identification of states for therapeutic intervention

Amit Jangid<sup>1,2</sup>, Md Zubair Malik<sup>1\*</sup>, Ram Ramaswamy<sup>2\*</sup> and R.K. Brojen Singh<sup>1\*</sup>

<sup>1\*</sup>*School of Computational and Integrative Sciences, Jawaharlal Nehru University, New Delhi 110067, India.*

<sup>2</sup>*Department of Chemistry, Indian Institute of Technology Delhi, New Delhi 110016, India.*

### Minimal regulatory network

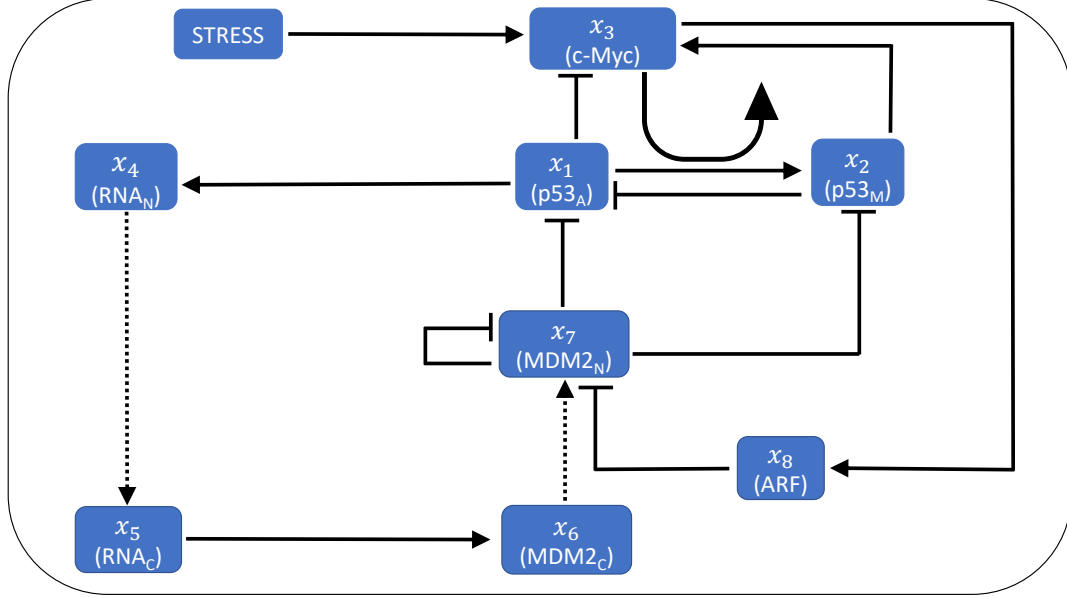

FIG. 1: Interaction network for p53<sub>A</sub>-p53<sub>M</sub>-MDM2-ARF-Stress. Modified network from [1] where p53<sub>A</sub> inhibits activation of c-Myc [2] [3]. c-Myc pro-oncogene induces the expression of p53<sub>M</sub> from p53<sub>A</sub> due to de-regulation in c-Myc [4]. Dashed arrow shows movement from nucleus to cytoplasm or vice versa, while solid arrow, and bars corresponds to activation, and inhibition on respective node.

\*Electronic address: zubbairmalik@jnu.ac.in, ramaswamy@iitd.ac.in, brojen@jnu.ac.in

## Mathematical framework of the model system

$$\begin{aligned}
\frac{dx_1}{dt} &= k_p - \left( k_1 x_7 + d_p + \gamma_{x_1} x_2 + \delta_{x_1} \frac{x_3^{n_1}}{K_1^{n_1} + x_3^{n_1}} \right) x_1 \\
\frac{dx_2}{dt} &= \alpha_{x_2} + \delta_{x_1} \frac{x_3^{n_1}}{K_1^{n_1} + x_3^{n_1}} x_1 - \gamma_{x_2} x_7 x_2 - \delta_{x_2} x_2 \\
\frac{dx_3}{dt} &= \alpha_{x_3} + \beta_{x_3} \frac{S^{n_2}}{K_2^{n_2} + S^{n_2}} + \delta_{x_3} \frac{x_2^{n_3}}{K_3^{n_3} + x_2^{n_3}} - \gamma_{x_3} x_3 - \omega_{x_3} x_3 x_1 \\
\frac{dx_4}{dt} &= k_m + k_2 \frac{x_1^{1.8}}{k_D^{1.8} + x_1^{1.8}} - k_0 x_4 \\
\frac{dx_5}{dt} &= k_0 x_4 - d_{rc} x_5 \\
\frac{dx_6}{dt} &= k_T x_5 - k_i x_6 \\
\frac{dx_7}{dt} &= k_i x_6 - d_{mn} x_6^2 - k_3 x_7 x_8 \\
\frac{dx_8}{dt} &= k_a + \delta \frac{x_3^{n_4}}{K_4^{n_4} + x_3^{n_4}} x_8 - d_a x_8 - k_3 x_7 x_8
\end{aligned} \tag{1}$$

Here,  $x_3$  is c-Myc oncogene, and  $\omega_{x_3}$  is the parameter which represents activated p53 dependent decay rate in c-Myc.  $\omega_{x_3} = 9.963 \times 10^{-8}$ , and rest of all the parameter are the same as in table 1 in main text. See the main text for the detail of the equations. Red term in coupled differential equation shows the inhibition in c-Myc by p53<sub>A</sub>.

## Results

### Oncogenic regulation of normal and cancer dynamics

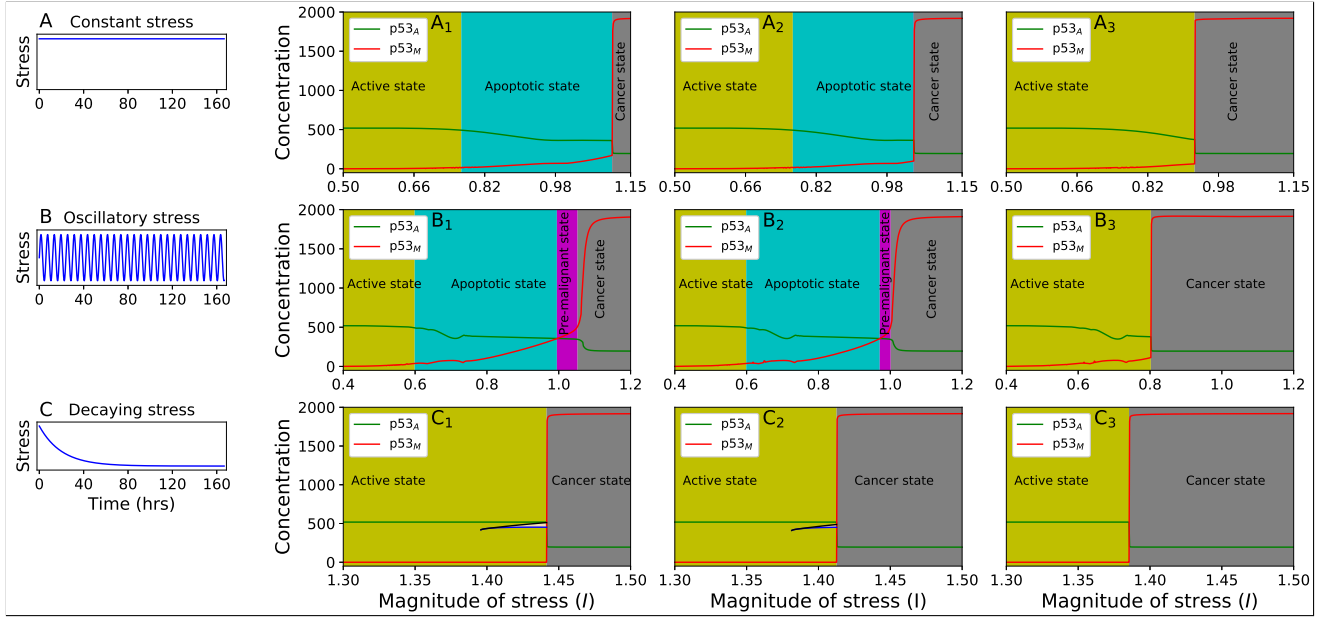

FIG. 2: The left column show three different form of stress discussed about.  $A_1$ ,  $A_2$ , and  $A_3$  display the steady state behaviour against magnitude of stress for different  $K_3$  values 1000.0, 750.0, and 400.0 respectively driven with constant stress.  $B_1$ ,  $B_2$ , and  $B_3$  display the steady state behaviour against magnitude of stress for different  $K_3$  values 2000.0, 1400.0, and 800.0 respectively driven with oscillatory stress.  $C_1$ ,  $C_2$ , and  $C_3$  display the steady state behaviour against amplitude for different  $K_3$  values 700.0, 650.0, and 600.0 respectively driven with decaying stress. Yellow region, cyan region, and grey region correspond to active, apoptotic, pre-malignant, and cancer state respectively. In panel  $C_1$ , and  $C_2$  (wheat region) black line (upper line), and blue line (lower line) show maximum of  $p53_M$ , and maximum of  $p53_A$  in  $T_{ps}$  (see the text) time region, which corresponds to the initial cancer condition. In constant stress case we did not observe pre-malignant regime.

# Phase transition, key to therapeutic intervention and cancer recovery phase

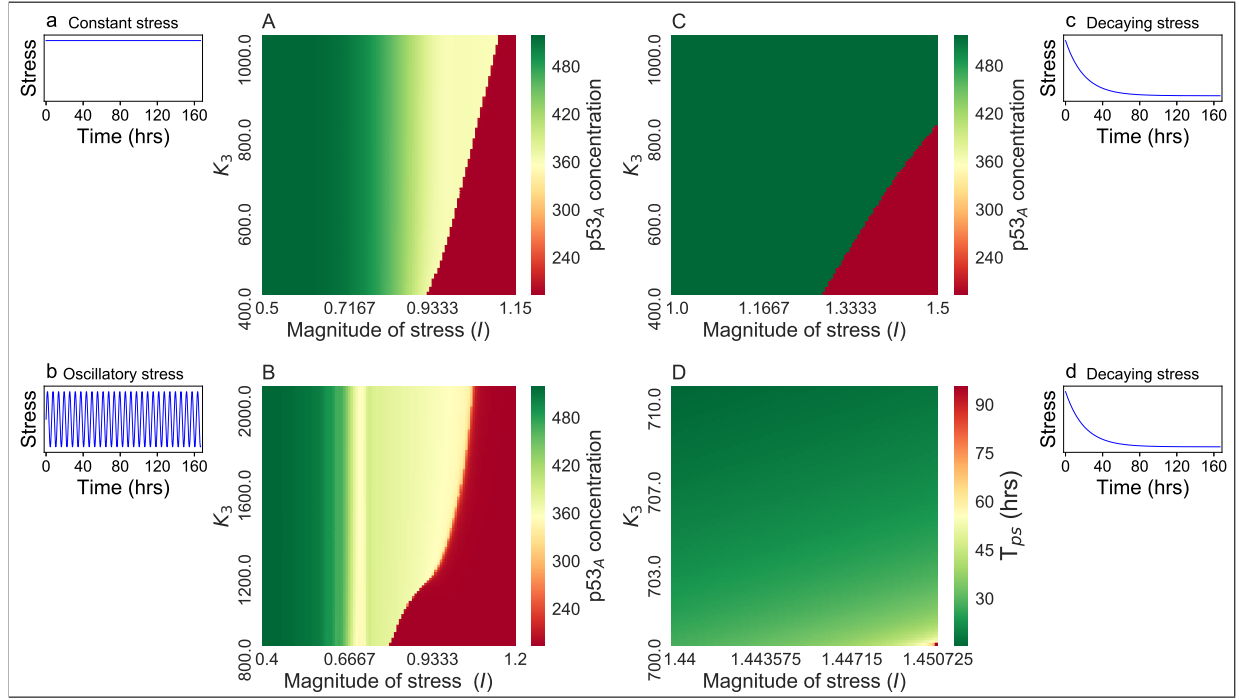

FIG. 3: A, B, and C show the two parameter ( $Magnitude\ of\ stress\ (I)$ ,  $K_3$ ) steady state behavior of the system driven by different stress a, b, and c respectively. D shows two parameter cancer recovery behaviour of the system ( $magnitude\ of\ stress$ , and  $K_3$ ) driven with decaying stress. On the heap map (panel A, B, and C) green, yellow, and red region indicate active, apoptotic, and cancer phase respectively.

- 
- [1] G. B. Leenders and J. A. Tuszynski. Stochastic and deterministic models of cellular p53 regulation. *Frontiers in oncology*, 3:12291244, 2013.
  - [2] J. S. L. Ho, W. Ma, D. Y. L. Mao, and S. Benchimol. p53-dependent transcriptional repression of c-myc is required for g1 cell cycle arrest. *Molecular and Cellular Biology*, 25(17):7423–7431, 2005.
  - [3] M. Sachdeva, S. Zhu, F. Wu, H. Wu, V. Walia, S. Kumar, R. Elble, K. Watabe, and Y. Y. Mo. p53 represses c-myc through induction of the tumor suppressor mir-145. *Proceedings of the National Academy of Sciences*, 106(9):3207–3212, 2009.
  - [4] B. Roy, J. Beamon, E. Balint, and D. Reisman. Transactivation of the human p53 tumor suppressor gene by c-myc/max contributes to elevated mutant p53 expression in some tumors. *Molecular and Cellular Biology*, 14(12):7805–7815, 1994.
